# Supplementary material for: Loci Associated with Negative Heterosis for Viability and Meat Productivity in Interspecific Sheep Hybrids
Source: MDPI journal article supplement (doi:10.3390/ani13010184), 2023-01-03
Supplement: s1 [file s1]

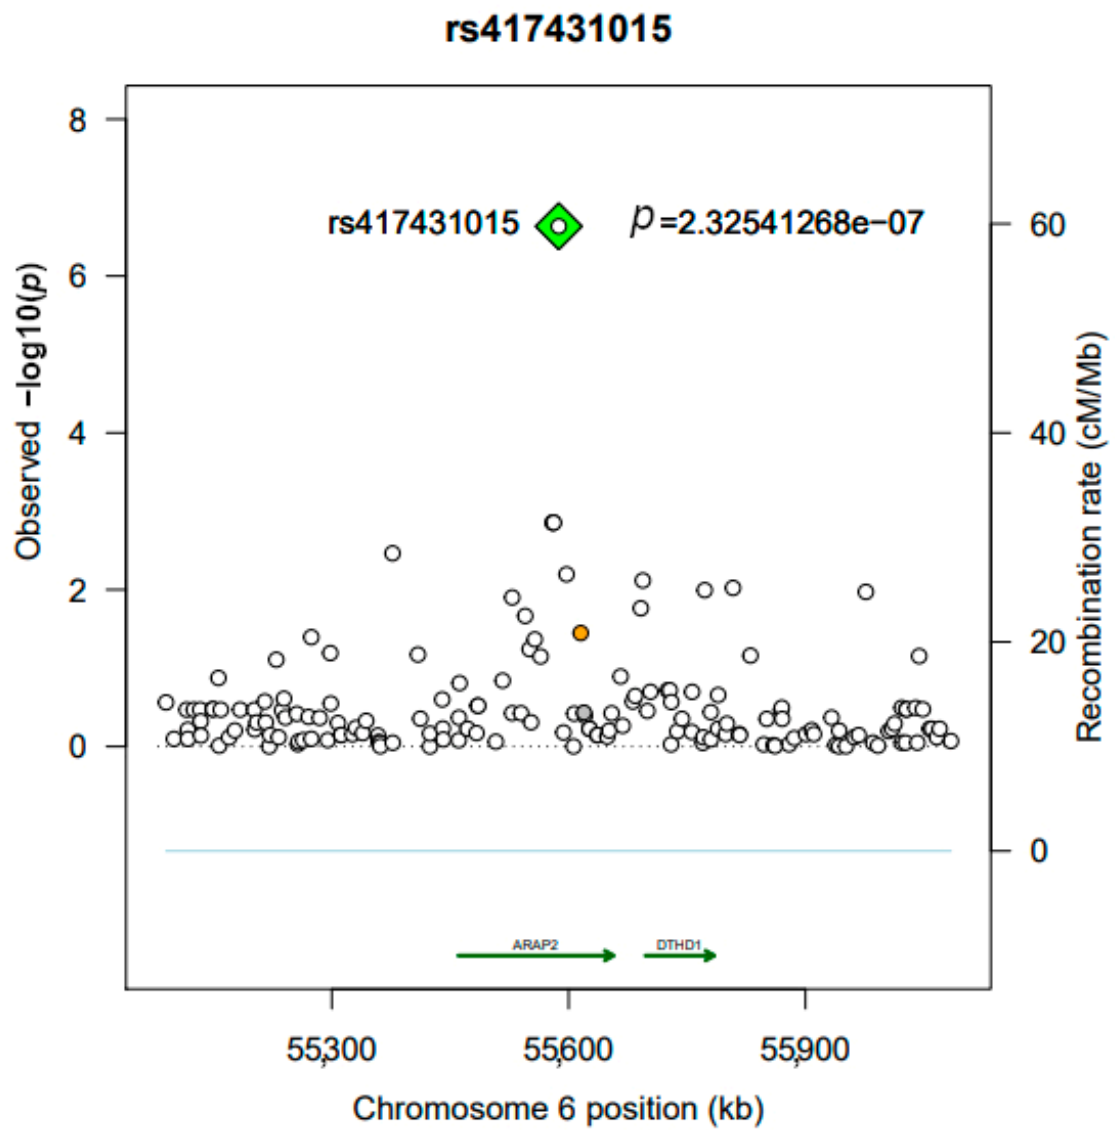

**Supplementary Figure S1.** The regional association plot for rs417431015.

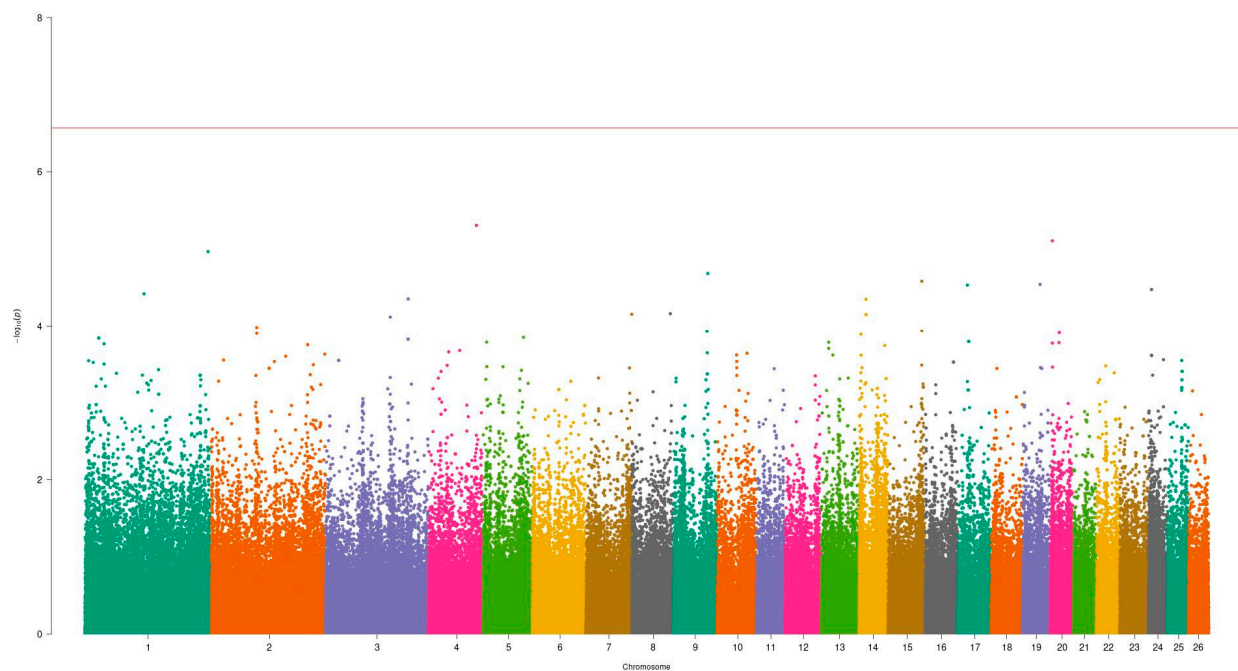

**Supplementary Figure S2.** The Manhattan plot for shortlegged index.

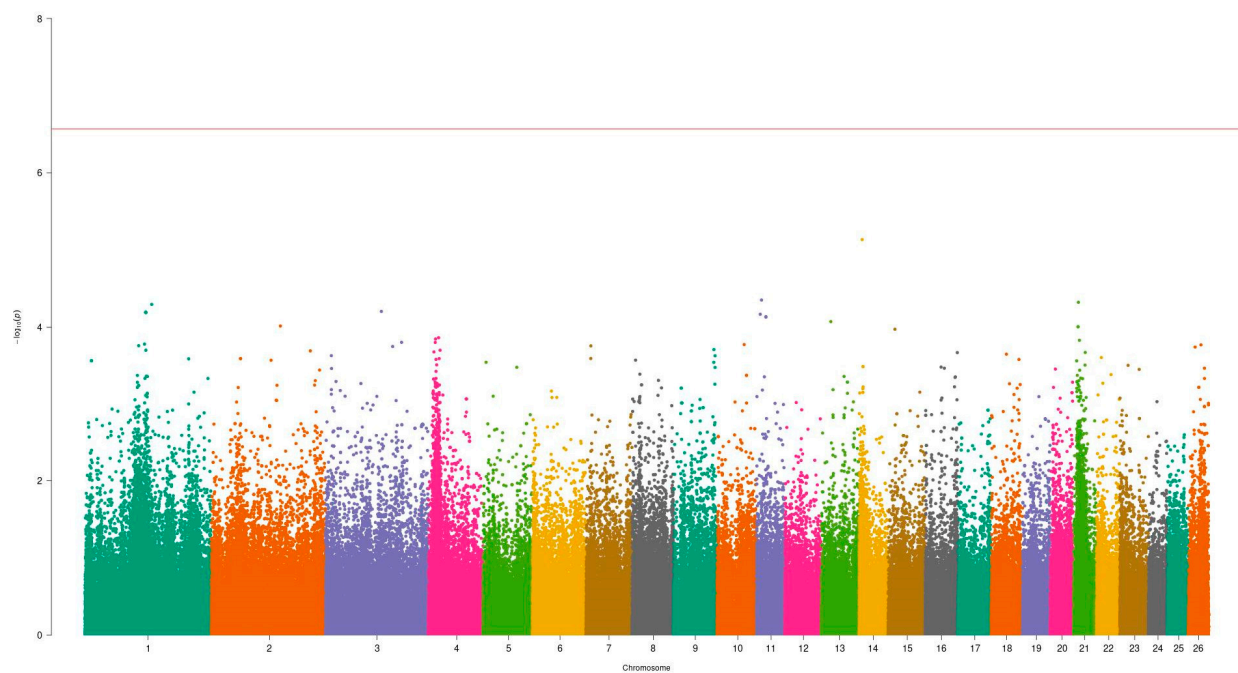

**Supplementary Figure S3.** The Manhattan plot for length index.

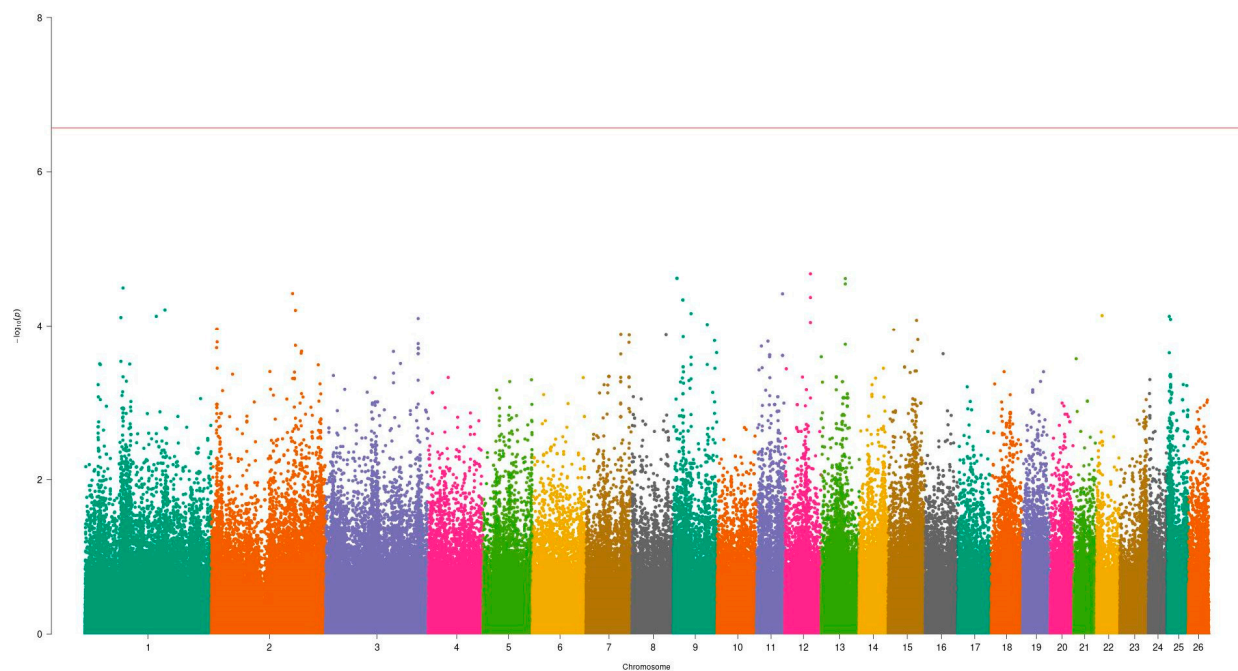

**Supplementary Figure S4.** The Manhattan plot for mass.

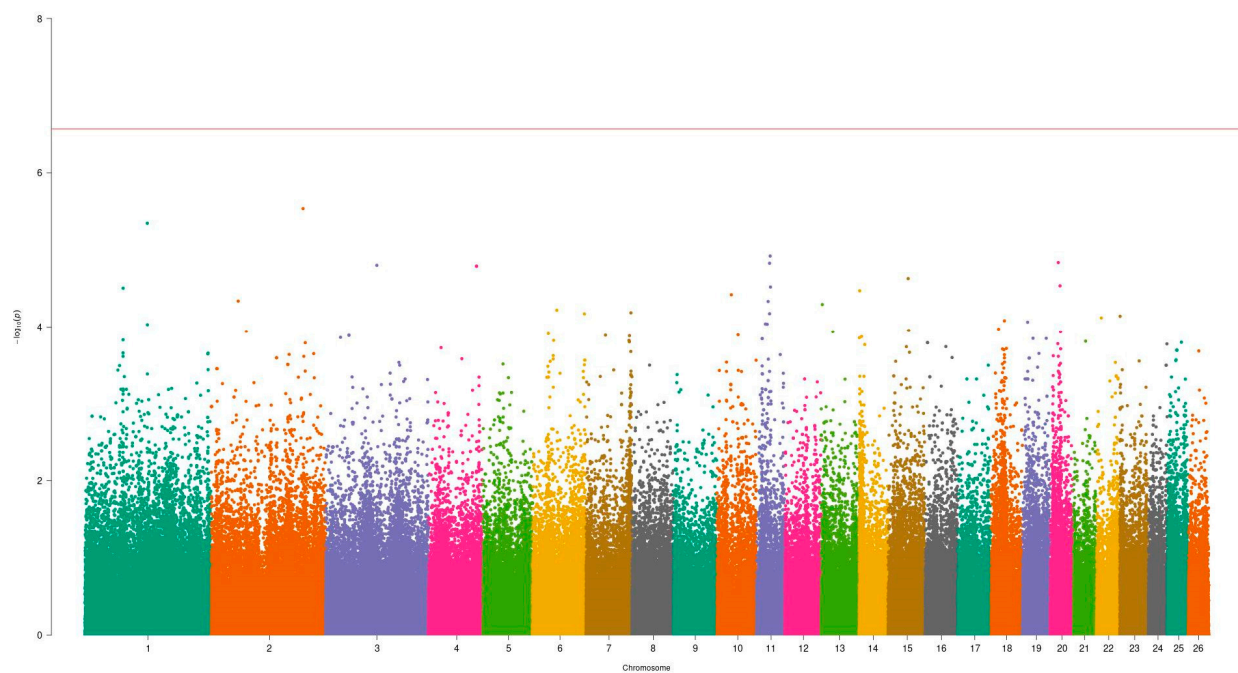

**Supplementary Figure S5.** The Manhattan plot for cumulative index.



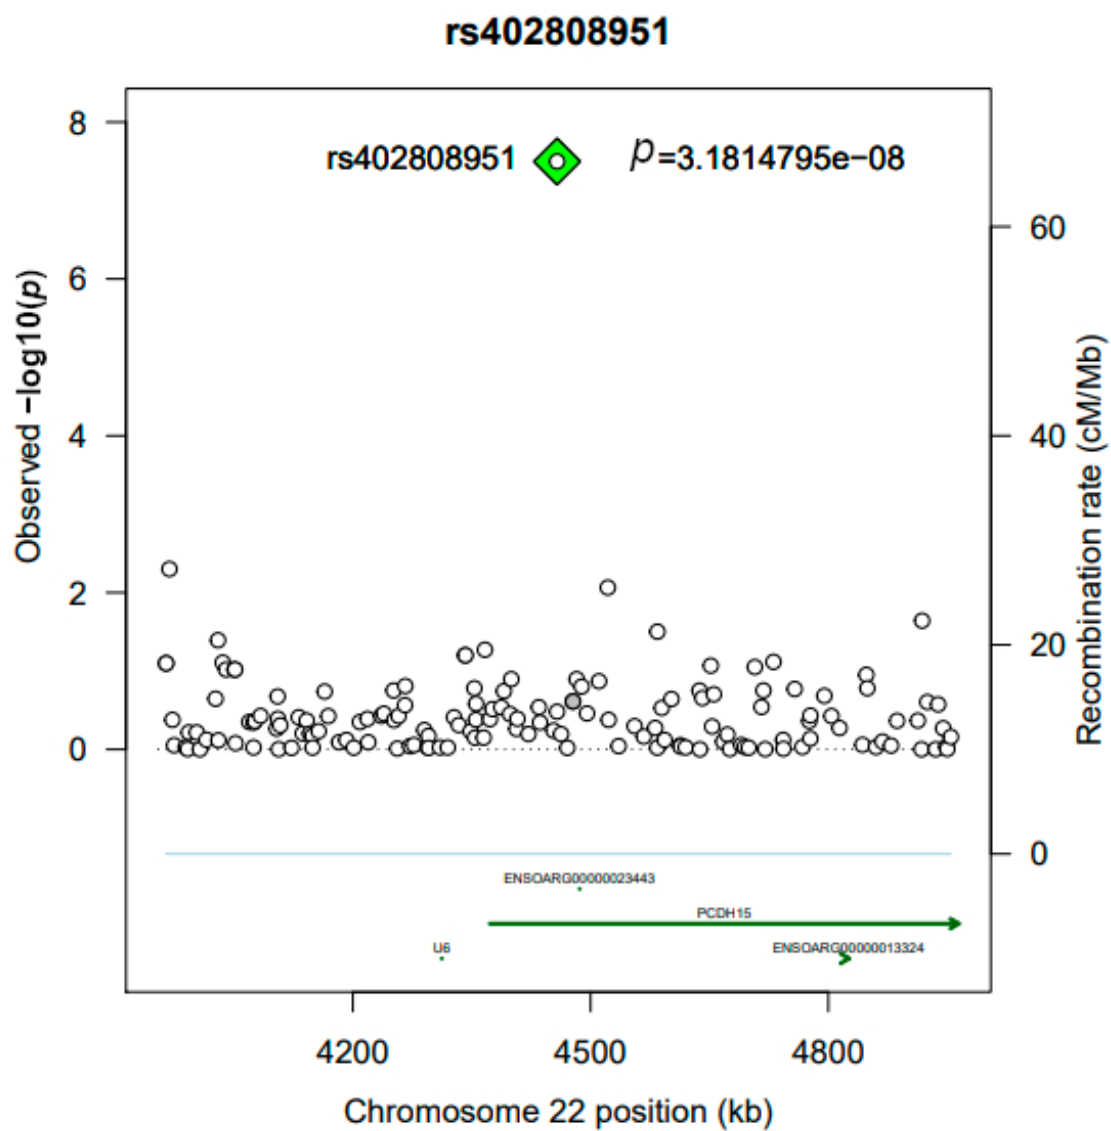

**Supplementary Figure S7.** The regional association plot for rs402808951.
