# Supplementary material for: Loci Associated with Negative Heterosis for Viability and Meat Productivity in Interspecific Sheep Hybrids
Source: Animals (Basel). 2023 Jan 3;13(1):184. doi: 10.3390/ani13010184 (PMC9817718; doi:10.3390/ani13010184)
Supplement: Supplementary file 1 [file animals-13-00184-s001.zip › Supplementary_Tables.xlsx]

## Sheet: ST1
Supplementary Table S1. Original measured traits
Traits
Height at withers
Height at back
Height at rump
Diagonal body length
Body length
Depth of chest
Width of chest
Width of rump
Girth of chest
Girth of metacarpus
Mass

## Sheet: ST2
Supplementary Table S2. Definition of indexes
Index name	Formula
Length index	(Body Length/Withers Heigth)*100
Compactness index	(Chest girth/Diagonal length of body)*100
Shortlegged index	(Depth of Chest/Withers Heigth)*100
Cummulative	Length_index + Compactness index + Shortlegged index

## Sheet: ST3
Supplementary Table S3. Lambda for each trait GWAS
Trait	Lambda
Сompactness_42d	0.458
Shortlegged_42d	0.505
Length_42d	0.483
Mass_42d	0.475
Cummulative_42d	0.651

## Sheet: ST4
Supplementary Table S4. Estimated heritability for each trait GWAS
Trait	V(G)/Vp	se	p-value
compactness_42d	0.457289	0.385627	1.5624e-01
length_42d	0.848659	0.265218	9.8601e-03
shortlegged_42d	0.363339	0.363106	1.6559e-01
cummulative_42d	0.793031	0.262807	7.2142e-03
mass_42d	0.535218	0.327609	6.7265e-02

## Sheet: ST5
Supplementary Table S5. Detailed results of VEP analysis for SNP associated with viability
Uploaded_variation	Location	Allele	Consequence	IMPACT	SYMBOL	Gene	Feature_type	Feature	BIOTYPE	EXON	INTRON	HGVSc	HGVSp	cDNA_position	CDS_position	Protein_position	Amino_acids	Codons	Existing_variation	DISTANCE	STRAND	FLAGS	SYMBOL_SOURCE	HGNC_ID	MANE_SELECT	MANE_PLUS_CLINICAL	TSL	APPRIS	SIFT	CLIN_SIG	SOMATIC	PHENO
rs417431015	6:55587508-55587508	G	intron_variant	MODIFIER	-	ENSOARG00000009322	Transcript	ENSOART00000010145.1	protein_coding	-	9/32	-	-	-	-	-	-	-	rs417431015	-	-1	-	-	-	-	-	-	-	-	-	-	-

## Sheet: ST6
Supplementary Table S6. Detailed results of VEP analysis for GWAS SNPs
#Uploaded_variation	Location	Allele	Consequence	IMPACT	SYMBOL	Gene	Feature_type	Feature	BIOTYPE	EXON	INTRON	HGVSc	HGVSp	cDNA_position	CDS_position	Protein_position	Amino_acids	Codons	Existing_variation	DISTANCE	STRAND	FLAGS	SYMBOL_SOURCE	HGNC_ID	MANE_SELECT	MANE_PLUS_CLINICAL	TSL	APPRIS	SIFT	CLIN_SIG	SOMATIC	PHENO
rs413302370	15:50414913-50414913	G	intergenic_variant	MODIFIER	-	-	-	-	-	-	-	-	-	-	-	-	-	-	rs413302370	-	-	-	-	-	-	-	-	-	-	-	-	-
rs412448081	15:50425026-50425026	T	intergenic_variant	MODIFIER	-	-	-	-	-	-	-	-	-	-	-	-	-	-	rs412448081	-	-	-	-	-	-	-	-	-	-	-	-	-
rs402808951	22:4457667-4457667	G	intron_variant	MODIFIER	-	ENSOARG00000013216	Transcript	ENSOART00000014373.1	protein_coding	-	2/37	-	-	-	-	-	-	-	rs402808951	-	1	-	-	-	-	-	-	-	-	-	-	-

## Sheet: ST7
Supplementary Table S7. P-value for different models of inheritance for snp rs417431015
Model	p_value
Additive	0.004
Recessive	0.994
Dominant	0.382
Overdominant	0.035
